# Supplementary material
Source: publisher figshare collection journal article supplement (https://gsajournals.figshare.com/ndownloader/files/21512190)
Supplement: Supplementary file 1 [file 21512190]

## Sheet: prg_mass_spec
Accession.Number	Identified.proteins	Molecular.Weight	N2.control.rep1	DQAD.control.rep1	FLAG..PRG.1.rep1	FLAG..PRG.1..DQAD.rep1	FLAG..PRG.1.control..GFP..PRG.1..rep2	FLAG..PRG.1.rep2	FLAG..PRG.1..DQAD.rep2
P90786_CAEEL	Piwi-like protein OS=Caenorhabditis elegans GN=prg-1 PE=1 SV=1	94 kDa	0	0	234	391	0	166	195
VIT2_CAEEL [2]	Cluster of Vitellogenin-2 OS=Caenorhabditis elegans GN=vit-2 PE=1 SV=5 (VIT2_CAEEL)	188 kDa	0	0	29	190	1	12	0
VIT1_CAEEL	Vitellogenin-1 OS=Caenorhabditis elegans GN=vit-1 PE=1 SV=2	188 kDa	0	0	19	162	1	11	0
VIT2_CAEEL	Vitellogenin-2 OS=Caenorhabditis elegans GN=vit-2 PE=1 SV=5	188 kDa	0	0	26	157	1	7	0
VIT5_CAEEL [3]	Cluster of Vitellogenin-5 OS=Caenorhabditis elegans GN=vit-5 PE=2 SV=2 (VIT5_CAEEL)	186 kDa	0	0	23	138	0	8	0
VIT5_CAEEL	Vitellogenin-5 OS=Caenorhabditis elegans GN=vit-5 PE=2 SV=2	186 kDa	0	0	22	121	0	8	0
VIT6_CAEEL	Vitellogenin-6 OS=Caenorhabditis elegans GN=vit-6 PE=1 SV=5	193 kDa	0	0	15	117	2	6	0
VIT3_CAEEL	Vitellogenin-3 OS=Caenorhabditis elegans GN=vit-3 PE=1 SV=1	187 kDa	0	0	17	108	0	7	0
VIT4_CAEEL	Vitellogenin-4 OS=Caenorhabditis elegans GN=vit-4 PE=1 SV=3	186 kDa	0	0	17	105	0	0	0
NP_006112.3	keratin, type II cytoskeletal 1 CONTAMINANT [Homo sapiens]	66 kDa	0	32	8	98	78	34	49
GLH1_CAEEL	ATP-dependent RNA helicase glh-1 OS=Caenorhabditis elegans GN=glh-1 PE=1 SV=3	80 kDa	0	0	1	83	0	0	15
NP_000412.3	keratin, type I cytoskeletal 10 CONTAMINANT [Homo sapiens]	59 kDa	0	38	1	57	66	13	20
NP_000412.3 [2]	Cluster of keratin, type I cytoskeletal 10 CONTAMINANT [Homo sapiens] (NP_000412.3)	59 kDa	0	39	1	57	67	13	20
TBA2_CAEEL [4]	Cluster of Tubulin alpha-2 chain OS=Caenorhabditis elegans GN=tba-2 PE=2 SV=1 (TBA2_CAEEL)	50 kDa	2	0	13	57	0	0	0
TBA2_CAEEL	Tubulin alpha-2 chain OS=Caenorhabditis elegans GN=tba-2 PE=2 SV=1	50 kDa	2	0	13	54	0	1	0
O17921_CAEEL [4]	Cluster of Tubulin beta chain OS=Caenorhabditis elegans GN=tbb-1 PE=1 SV=1 (O17921_CAEEL)	50 kDa	0	0	26	53	0	0	0
EF1A_CAEEL	Elongation factor 1-alpha OS=Caenorhabditis elegans GN=eft-3 PE=3 SV=1	51 kDa	0	0	18	52	2	9	5
H2L2E8_CAEEL (+1)	Tubulin alpha chain OS=Caenorhabditis elegans GN=tba-1 PE=1 SV=1	51 kDa	0	0	0	50	0	0	0
O17921_CAEEL	Tubulin beta chain OS=Caenorhabditis elegans GN=tbb-1 PE=1 SV=1	50 kDa	0	0	26	46	0	1	0
TBB2_CAEEL	Tubulin beta-2 chain OS=Caenorhabditis elegans GN=tbb-2 PE=3 SV=1	50 kDa	0	0	26	46	0	1	0
PYC1_CAEEL	Pyruvate carboxylase 1 OS=Caenorhabditis elegans GN=pyc-1 PE=1 SV=1	129 kDa	0	0	5	42	0	0	0
G5EDD4_CAEEL	Tubulin alpha chain OS=Caenorhabditis elegans GN=tba-4 PE=1 SV=1	50 kDa	0	0	0	41	0	0	0
GLH2_CAEEL	ATP-dependent RNA helicase glh-2 OS=Caenorhabditis elegans GN=glh-2 PE=1 SV=1	100 kDa	0	0	0	40	0	0	9
NP_000217.2	keratin, type I cytoskeletal 9 CONTAMINANT [Homo sapiens]	62 kDa	0	0	0	39	29	9	21
E9P860_CAEEL (+1)	Uncharacterized protein OS=Caenorhabditis elegans GN=CELE_ZK1067.2 PE=1 SV=1	280 kDa	0	0	0	32	0	0	0
WAGO1_CAEEL	Argonaute protein wago-1 OS=Caenorhabditis elegans GN=wago-1 PE=1 SV=1	105 kDa	0	0	0	31	0	11	11
HSP90_CAEEL	Heat shock protein 90 OS=Caenorhabditis elegans GN=daf-21 PE=1 SV=1	80 kDa	1	0	1	29	0	0	0
HSP90_CAEEL [2]	Cluster of Heat shock protein 90 OS=Caenorhabditis elegans GN=daf-21 PE=1 SV=1 (HSP90_CAEEL)	80 kDa	1	0	1	29	0	0	0
P00761.1	Trypsin precursor CONTAMINANT [Sus scrofa]	24 kDa	34	26	29	28	68	48	39
Q18817_CAEEL	Tubulin beta chain OS=Caenorhabditis elegans GN=ben-1 PE=1 SV=3	49 kDa	0	0	14	27	0	0	0
NP_000414.2 [2]	Cluster of keratin, type II cytoskeletal 2 epidermal CONTAMINANT [Homo sapiens] (NP_000414.2)	65 kDa	0	18	3	26	0	0	0
O45865_CAEEL	Adenine Nucleotide Translocator OS=Caenorhabditis elegans GN=ant-1.1 PE=1 SV=1	33 kDa	1	0	9	26	1	1	0
NP_000414.2	keratin, type II cytoskeletal 2 epidermal CONTAMINANT [Homo sapiens]	65 kDa	0	18	3	25	40	9	16
RL4_CAEEL	60S ribosomal protein L4 OS=Caenorhabditis elegans GN=rpl-4 PE=1 SV=3	39 kDa	0	0	4	24	0	4	6
HSP7A_CAEEL [3]	Cluster of Heat shock 70 kDa protein A OS=Caenorhabditis elegans GN=hsp-1 PE=1 SV=2 (HSP7A_CAEEL)	70 kDa	0	1	4	22	2	10	12
SUCB1_CAEEL	Probable succinate--CoA ligase [ADP-forming] subunit beta, mitochondrial OS=Caenorhabditis elegans GN=suca-1 PE=3 SV=1	47 kDa	0	0	3	22	0	0	0
HSP7A_CAEEL	Heat shock 70 kDa protein A OS=Caenorhabditis elegans GN=hsp-1 PE=1 SV=2	70 kDa	0	1	4	21	2	10	12
SIP1_CAEEL	Stress-induced protein 1 OS=Caenorhabditis elegans GN=sip-1 PE=1 SV=1	18 kDa	0	0	3	19	0	0	1
AAA02914.1	IgG CONTAMINANT [Homo sapiens]	52 kDa	0	0	0	18	0	0	0
Q18599_CAEEL	ACEtyl-CoA Regulator OS=Caenorhabditis elegans GN=acer-1 PE=1 SV=3	51 kDa	0	0	0	18	1	1	0
CLH_CAEEL	Probable clathrin heavy chain 1 OS=Caenorhabditis elegans GN=chc-1 PE=3 SV=1	192 kDa	0	0	0	17	0	0	0
IF4A_CAEEL [2]	Cluster of Eukaryotic initiation factor 4A OS=Caenorhabditis elegans GN=inf-1 PE=2 SV=1 (IF4A_CAEEL)	45 kDa	0	0	4	17	0	0	0
O45815_CAEEL [4]	Cluster of ACTin OS=Caenorhabditis elegans GN=act-5 PE=1 SV=1 (O45815_CAEEL)	42 kDa	1	1	2	17	0	0	0
GLH4_CAEEL	ATP-dependent RNA helicase glh-4 OS=Caenorhabditis elegans GN=glh-4 PE=1 SV=2	121 kDa	0	0	0	16	0	3	9
IF4A_CAEEL	Eukaryotic initiation factor 4A OS=Caenorhabditis elegans GN=inf-1 PE=2 SV=1	45 kDa	0	0	4	16	0	0	0
G5ECC3_CAEEL (+1)	Receptor Mediated Endocytosis OS=Caenorhabditis elegans GN=rme-1 PE=1 SV=1	94 kDa	0	0	0	15	0	0	0
O45815_CAEEL	ACTin OS=Caenorhabditis elegans GN=act-5 PE=1 SV=1	42 kDa	1	1	2	15	0	0	0
RL23_CAEEL	60S ribosomal protein L23 OS=Caenorhabditis elegans GN=rpl-23 PE=3 SV=1	15 kDa	0	0	1	15	0	0	1
CAA76847.1	bovine serum albumin CONTAMINANT [Bos taurus]	69 kDa	0	0	0	14	0	0	0
IDH3A_CAEEL	Probable isocitrate dehydrogenase [NAD] subunit alpha, mitochondrial OS=Caenorhabditis elegans GN=idha-1 PE=3 SV=3	38 kDa	0	0	2	14	0	0	0
Q19130_CAEEL [3]	Cluster of Glutamine-Fructose 6-phosphate AminoTransferase homolog OS=Caenorhabditis elegans GN=gfat-1 PE=1 SV=1 (Q19130_CAEEL)	81 kDa	0	0	0	14	0	0	0
TBB1_CAEEL	Tubulin beta-1 chain OS=Caenorhabditis elegans GN=mec-7 PE=2 SV=1	49 kDa	0	0	3	12	0	0	0
YKA3_CAEEL	Uncharacterized protein B0303.3 OS=Caenorhabditis elegans GN=B0303.3 PE=3 SV=1	48 kDa	0	0	2	12	0	0	0
ACADM_CAEEL	Probable medium-chain specific acyl-CoA dehydrogenase 10, mitochondrial OS=Caenorhabditis elegans GN=acdh-10 PE=2 SV=1	45 kDa	0	0	0	11	0	0	0
EF2_CAEEL	Elongation factor 2 OS=Caenorhabditis elegans GN=eef-2 PE=2 SV=4	95 kDa	0	0	2	11	0	0	0
IDH3B_CAEEL	Probable isocitrate dehydrogenase [NAD] subunit beta, mitochondrial OS=Caenorhabditis elegans GN=idhb-1 PE=3 SV=1	42 kDa	0	0	1	11	0	0	0
Q19130_CAEEL (+1)	Glutamine-Fructose 6-phosphate AminoTransferase homolog OS=Caenorhabditis elegans GN=gfat-1 PE=1 SV=1	81 kDa	0	0	0	11	0	0	0
Q19699_CAEEL	Glutamine-Fructose 6-phosphate AminoTransferase homolog OS=Caenorhabditis elegans GN=gfat-2 PE=1 SV=1	79 kDa	0	0	0	11	0	0	0
Q9N5V3_CAEEL	IMportin Beta family OS=Caenorhabditis elegans GN=imb-3 PE=1 SV=2	122 kDa	0	0	0	11	0	0	0
ATPB_CAEEL	ATP synthase subunit beta, mitochondrial OS=Caenorhabditis elegans GN=atp-2 PE=1 SV=2	58 kDa	0	0	3	10	0	0	0
GYS_CAEEL	Glycogen [starch] synthase OS=Caenorhabditis elegans GN=gsy-1 PE=1 SV=1	76 kDa	0	0	2	9	0	0	0
RL21_CAEEL	60S ribosomal protein L21 OS=Caenorhabditis elegans GN=rpl-21 PE=3 SV=3	18 kDa	0	0	1	8	0	0	0
ACT3_CAEEL (+2)	Actin-3 OS=Caenorhabditis elegans GN=act-3 PE=1 SV=1	42 kDa	1	0	2	7	0	0	0
PRS10_CAEEL	Probable 26S protease regulatory subunit 10B OS=Caenorhabditis elegans GN=rpt-4 PE=1 SV=2	46 kDa	0	0	0	7	0	0	0
Q9N4H7_CAEEL	Coatomer subunit alpha OS=Caenorhabditis elegans GN=copa-1 PE=1 SV=2	138 kDa	0	0	1	7	0	0	0
RL35A_CAEEL	60S ribosomal protein L35a OS=Caenorhabditis elegans GN=rpl-33 PE=1 SV=3	14 kDa	0	0	2	7	0	0	0
Q9NEM5_CAEEL	Uncharacterized protein OS=Caenorhabditis elegans GN=CELE_Y111B2A.3 PE=1 SV=1	83 kDa	0	0	0	6	0	0	2
SAR1_CAEEL	GTP-binding protein SAR1 OS=Caenorhabditis elegans GN=ZK180.4 PE=3 SV=1	22 kDa	0	0	1	6	0	0	0
G5ECU5_CAEEL (+1)	Uncharacterized protein OS=Caenorhabditis elegans GN=CELE_F44E5.4 PE=1 SV=1	71 kDa	0	0	0	5	0	0	0
GST36_CAEEL	Probable glutathione S-transferase gst-36 OS=Caenorhabditis elegans GN=gst-36 PE=3 SV=2	24 kDa	0	0	0	5	0	0	0
O17218_CAEEL	Ribosomal Protein, Small subunit OS=Caenorhabditis elegans GN=rps-22 PE=1 SV=1	15 kDa	0	0	0	5	0	1	2
PGL1_CAEEL (+1)	P granule abnormality protein 1 OS=Caenorhabditis elegans GN=pgl-1 PE=1 SV=1	78 kDa	0	0	0	5	0	0	0
Q19278_CAEEL (+1)	3-hydroxyisobutyryl-CoA hydrolase, mitochondrial OS=Caenorhabditis elegans GN=CELE_F09F7.4 PE=1 SV=1	43 kDa	0	0	0	5	0	0	0
Q20049_CAEEL	Isocitrate dehydrogenase [NAD] subunit, mitochondrial OS=Caenorhabditis elegans GN=idhg-1 PE=1 SV=2	44 kDa	0	0	0	5	0	0	0
Q95YD8_CAEEL	Isocitrate dehydrogenase [NAD] subunit, mitochondrial OS=Caenorhabditis elegans GN=idhg-2 PE=1 SV=1	41 kDa	0	0	0	5	1	0	0
RS2_CAEEL	40S ribosomal protein S2 OS=Caenorhabditis elegans GN=rps-2 PE=3 SV=1	29 kDa	0	0	0	5	0	0	0
GBLP_CAEEL	Guanine nucleotide-binding protein subunit beta-2-like 1 OS=Caenorhabditis elegans GN=rack-1 PE=1 SV=3	36 kDa	0	0	1	4	0	1	4
HSP7D_CAEEL	Heat shock 70 kDa protein D OS=Caenorhabditis elegans GN=hsp-4 PE=1 SV=2	72 kDa	0	0	0	4	0	2	0
LRP_CAEEL	Low-density lipoprotein receptor-related protein OS=Caenorhabditis elegans GN=lrp-1 PE=1 SV=1	526 kDa	0	0	0	4	0	0	0
Q9NLD1_CAEEL	HnRNP A1 homolog OS=Caenorhabditis elegans GN=hrp-2 PE=1 SV=2	66 kDa	0	0	0	4	0	0	0
VATA_CAEEL	V-type proton ATPase catalytic subunit A OS=Caenorhabditis elegans GN=vha-13 PE=1 SV=3	66 kDa	0	0	0	4	0	0	0
3HIDH_CAEEL	Probable 3-hydroxyisobutyrate dehydrogenase, mitochondrial OS=Caenorhabditis elegans GN=B0250.5 PE=3 SV=1	31 kDa	0	0	0	3	0	0	0
A0A0K3AUJ9_CAEEL (+2)	PeRoxireDoXin OS=Caenorhabditis elegans GN=prdx-2 PE=1 SV=1	22 kDa	0	0	0	3	1	0	0
Q19057_CAEEL	Acyl CoA DeHydrogenase OS=Caenorhabditis elegans GN=acdh-12 PE=1 SV=1	66 kDa	0	0	0	3	0	0	0
Q9XTT9_CAEEL	Proteasome Regulatory Particle, ATPase-like OS=Caenorhabditis elegans GN=rpt-6 PE=1 SV=1	46 kDa	0	0	1	3	0	0	0
RS5_CAEEL	40S ribosomal protein S5 OS=Caenorhabditis elegans GN=rps-5 PE=3 SV=1	23 kDa	0	0	0	3	0	1	1
YZVL_CAEEL	Uncharacterized NOP5 family protein K07C5.4 OS=Caenorhabditis elegans GN=K07C5.4 PE=3 SV=1	55 kDa	0	0	0	3	0	0	0
HSP7C_CAEEL	Heat shock 70 kDa protein C OS=Caenorhabditis elegans GN=hsp-3 PE=3 SV=2	73 kDa	0	0	0	0	0	2	0
O77727.1	Keratin, type I cytoskeletal 15 SHEEP CONTAMINANT [Ovis aries]	49 kDa	0	5	0	0	9	0	0
ACT3_CAEEL	Actin-3 OS=Caenorhabditis elegans GN=act-3 PE=1 SV=1	42 kDa	0	0	0	0	2	0	0
ACT3_CAEEL [2]	Cluster of Actin-3 OS=Caenorhabditis elegans GN=act-3 PE=1 SV=1 (ACT3_CAEEL)	42 kDa	0	0	0	0	2	0	0
ALH13_CAEEL	Probable delta-1-pyrroline-5-carboxylate synthase OS=Caenorhabditis elegans GN=alh-13 PE=3 SV=2	87 kDa	0	0	0	0	1	0	0
B2MZC1_CAEEL (+1)	Uncharacterized protein OS=Caenorhabditis elegans GN=CELE_R102.11 PE=4 SV=1	13 kDa	0	0	0	0	0	0	1
CH60_CAEEL	Chaperonin homolog Hsp-60, mitochondrial OS=Caenorhabditis elegans GN=hsp-60 PE=2 SV=2	60 kDa	0	0	0	0	0	0	1
CLUA1_CAEEL	Clusterin-associated protein 1 homolog OS=Caenorhabditis elegans GN=dyf-3 PE=2 SV=2	47 kDa	0	0	0	0	0	0	1
E9P860_CAEEL	Uncharacterized protein OS=Caenorhabditis elegans GN=CELE_ZK1067.2 PE=1 SV=1	280 kDa	0	0	0	0	1	1	4
EF1A_CAEEL [2]	Cluster of Elongation factor 1-alpha OS=Caenorhabditis elegans GN=eft-3 PE=3 SV=1 (EF1A_CAEEL)	51 kDa	0	0	0	0	2	9	5
F5GU98_CAEEL (+3)	Calcium-transporting ATPase OS=Caenorhabditis elegans GN=mca-1 PE=1 SV=1	119 kDa	0	0	0	0	0	0	1
G5EBY3_CAEEL	Non-muscle MYosin OS=Caenorhabditis elegans GN=nmy-2 PE=1 SV=1	231 kDa	0	0	0	0	4	0	0
G5EC69_CAEEL (+3)	Protein-tyrosine-phosphatase OS=Caenorhabditis elegans GN=CELE_T13H5.1 PE=1 SV=1	101 kDa	0	0	0	0	0	1	0
G5EDU3_CAEEL	PhosphoLipase D OS=Caenorhabditis elegans GN=pld-1 PE=1 SV=1	164 kDa	0	0	0	0	0	1	0
GLH1_CAEEL [3]	Cluster of ATP-dependent RNA helicase glh-1 OS=Caenorhabditis elegans GN=glh-1 PE=1 SV=3 (GLH1_CAEEL)	80 kDa	0	0	0	0	0	0	15
H2L0I8_CAEEL (+1)	Uncharacterized protein OS=Caenorhabditis elegans GN=CELE_T04C4.1 PE=1 SV=1	106 kDa	0	0	0	0	1	0	0
INS17_CAEEL	Insulin-like peptide 17 OS=Caenorhabditis elegans GN=ins-17 PE=2 SV=1	12 kDa	0	0	0	0	0	0	1
MED29_CAEEL	Mediator of RNA polymerase II transcription subunit 29 OS=Caenorhabditis elegans GN=mdt-29 PE=1 SV=1	48 kDa	0	0	0	0	0	0	1
MLC5_CAEEL	Myosin-2 essential light chain OS=Caenorhabditis elegans GN=mlc-5 PE=1 SV=1	16 kDa	0	0	0	0	1	0	0
NHR65_CAEEL	Nuclear hormone receptor family member nhr-65 OS=Caenorhabditis elegans GN=nhr-65 PE=2 SV=1	47 kDa	0	0	0	0	0	0	1
O01442_CAEEL	Uncharacterized protein OS=Caenorhabditis elegans GN=B0261.7 PE=1 SV=1	39 kDa	0	0	0	0	0	0	1
O01869_CAEEL	Ribosomal Protein, Small subunit OS=Caenorhabditis elegans GN=rps-10 PE=1 SV=1	17 kDa	0	0	0	0	0	2	2
O16266_CAEEL	Uncharacterized protein OS=Caenorhabditis elegans GN=CELE_F40A3.6 PE=1 SV=1	30 kDa	0	0	0	0	55	85	29
O16488_CAEEL	Uncharacterized protein OS=Caenorhabditis elegans GN=B0238.12 PE=4 SV=1	18 kDa	0	0	0	0	0	0	1
O17921_CAEEL [3]	Cluster of Tubulin beta chain OS=Caenorhabditis elegans GN=tbb-1 PE=1 SV=1 (O17921_CAEEL)	50 kDa	0	0	0	0	0	1	0
O18169_CAEEL	Uncharacterized protein OS=Caenorhabditis elegans GN=CELE_W04G5.4 PE=1 SV=2	60 kDa	0	0	0	0	0	0	1
O18240_CAEEL	Ribosomal Protein, Small subunit OS=Caenorhabditis elegans GN=rps-18 PE=1 SV=1	18 kDa	0	0	0	0	0	1	3
O44804_CAEEL	Uncharacterized protein OS=Caenorhabditis elegans GN=CELE_F14D2.8 PE=4 SV=4	32 kDa	0	0	0	0	0	0	2
O45865_CAEEL [3]	Cluster of Adenine Nucleotide Translocator OS=Caenorhabditis elegans GN=ant-1.1 PE=1 SV=1 (O45865_CAEEL)	33 kDa	0	0	0	0	1	1	0
O61763_CAEEL	Uncharacterized protein OS=Caenorhabditis elegans GN=CELE_ZK380.4 PE=4 SV=1	28 kDa	0	0	0	0	16	0	0
Q17595_CAEEL	Uncharacterized protein OS=Caenorhabditis elegans GN=dyf-11 PE=4 SV=1	60 kDa	0	0	0	0	0	0	2
Q18280_CAEEL	Uncharacterized protein OS=Caenorhabditis elegans GN=C28C12.4 PE=1 SV=1	25 kDa	0	0	0	0	0	0	1
Q18975_CAEEL	COLlagen OS=Caenorhabditis elegans GN=col-114 PE=1 SV=2	32 kDa	0	0	0	0	0	0	1
Q19147_CAEEL	Uncharacterized protein OS=Caenorhabditis elegans GN=CELE_F07C3.2 PE=1 SV=2	15 kDa	0	0	0	0	0	0	1
Q19725_CAEEL	COLlagen OS=Caenorhabditis elegans GN=col-60 PE=1 SV=1	31 kDa	0	0	0	0	0	0	1
Q19864_CAEEL	Cleavage and Polyadenylation Factor OS=Caenorhabditis elegans GN=cpf-1 PE=1 SV=1	48 kDa	0	0	0	0	3	0	0
Q19866_CAEEL	SUppressor-of-Forked (Drosophila) homolog OS=Caenorhabditis elegans GN=suf-1 PE=1 SV=1	85 kDa	0	0	0	0	2	0	0
Q1XFY9_CAEEL	Ribosomal Protein, Small subunit OS=Caenorhabditis elegans GN=rps-24 PE=1 SV=1	15 kDa	0	0	0	0	0	1	0
Q20206_CAEEL	Ribosomal Protein, Small subunit OS=Caenorhabditis elegans GN=rps-11 PE=1 SV=1	18 kDa	0	0	0	0	0	1	1
Q20476_CAEEL	Uncharacterized protein OS=Caenorhabditis elegans GN=CELE_F46G10.1 PE=1 SV=3	20 kDa	0	0	0	0	21	0	23
Q20644_CAEEL	Uncharacterized protein OS=Caenorhabditis elegans GN=CELE_F52B5.3 PE=1 SV=1	162 kDa	0	0	0	0	0	1	0
Q21514_CAEEL	Uncharacterized protein OS=Caenorhabditis elegans GN=CELE_M05B5.1 PE=1 SV=1	51 kDa	0	0	0	0	0	0	2
Q21614_CAEEL	Carbonic AnHydrase OS=Caenorhabditis elegans GN=cah-4 PE=1 SV=3	31 kDa	0	0	0	0	6	0	0
Q21793_CAEEL	Prion-like-(Q/N-rich)-domain-bearing protein OS=Caenorhabditis elegans GN=pqn-53 PE=1 SV=2	41 kDa	0	0	0	0	8	21	4
Q22779_CAEEL	Uncharacterized protein OS=Caenorhabditis elegans GN=CELE_T25D1.1 PE=4 SV=1	70 kDa	0	0	0	0	0	0	1
Q23181_CAEEL	Uncharacterized protein OS=Caenorhabditis elegans GN=gadr-4 PE=1 SV=2	92 kDa	0	0	0	0	0	0	1
Q23195_CAEEL	Uncharacterized protein OS=Caenorhabditis elegans GN=CELE_W06B4.2 PE=1 SV=1	58 kDa	0	0	0	0	27	0	0
Q7YWY3_CAEEL	Uncharacterized protein OS=Caenorhabditis elegans GN=CELE_K09C8.7 PE=4 SV=1	11 kDa	0	0	0	0	0	0	1
Q9BKU5_CAEEL	Uncharacterized protein OS=Caenorhabditis elegans GN=CELE_Y37E3.8 PE=1 SV=1	16 kDa	0	0	0	0	0	1	0
Q9N303_CAEEL	Uncharacterized protein OS=Caenorhabditis elegans GN=deps-1 PE=1 SV=1	69 kDa	0	0	0	0	0	0	1
Q9N3T8_CAEEL	MSH (MutS Homolog) family OS=Caenorhabditis elegans GN=msh-6 PE=1 SV=2	134 kDa	0	0	0	0	0	1	0
Q9N585_CAEEL	Piwi-like protein OS=Caenorhabditis elegans GN=ppw-2 PE=1 SV=1	108 kDa	0	0	0	0	0	1	2
Q9TZK4_CAEEL	Uncharacterized protein OS=Caenorhabditis elegans GN=CELE_F40H3.3 PE=4 SV=1	15 kDa	0	0	0	0	3	0	0
Q9U1X9_CAEEL	Ribosomal protein, Large subunit, Acidic (P1) OS=Caenorhabditis elegans GN=rla-2 PE=1 SV=1	11 kDa	0	0	0	0	0	0	1
Q9U302_CAEEL	Polyadenylate-binding protein OS=Caenorhabditis elegans GN=pab-1 PE=1 SV=1	72 kDa	0	0	0	0	0	1	0
Q9UAV9_CAEEL	Uncharacterized protein OS=Caenorhabditis elegans GN=hpo-26 PE=4 SV=2	19 kDa	0	0	0	0	0	0	1
Q9XV94_CAEEL	Uncharacterized protein OS=Caenorhabditis elegans GN=CELE_F16H6.7 PE=4 SV=3	21 kDa	0	0	0	0	0	1	0
Q9XVC1_CAEEL	Uncharacterized protein OS=Caenorhabditis elegans GN=C43D7.4 PE=4 SV=1	18 kDa	0	0	0	0	0	0	1
Q9XVE9_CAEEL	Ribosomal Protein, Large subunit OS=Caenorhabditis elegans GN=rpl-14 PE=1 SV=1	15 kDa	0	0	0	0	0	1	0
Q9XWW5_CAEEL	Uncharacterized protein OS=Caenorhabditis elegans GN=CELE_Y37D8A.4 PE=4 SV=1	26 kDa	0	0	0	0	0	1	0
Q9XXN2_CAEEL	MICOS complex subunit MIC60 OS=Caenorhabditis elegans GN=immt-2 PE=1 SV=2	73 kDa	0	0	0	0	2	0	0
R23A2_CAEEL	60S ribosomal protein L23a 2 OS=Caenorhabditis elegans GN=rpl-25.2 PE=3 SV=1	16 kDa	0	0	0	0	0	0	1
RAD50_CAEEL	DNA repair protein rad-50 OS=Caenorhabditis elegans GN=rad-50 PE=2 SV=1	150 kDa	0	0	0	0	10	0	0
RL12_CAEEL	60S ribosomal protein L12 OS=Caenorhabditis elegans GN=rpl-12 PE=3 SV=1	18 kDa	0	0	0	0	0	0	1
RL13_CAEEL	60S ribosomal protein L13 OS=Caenorhabditis elegans GN=rpl-13 PE=3 SV=1	24 kDa	0	0	0	0	0	2	2
RL15_CAEEL	60S ribosomal protein L15 OS=Caenorhabditis elegans GN=rpl-15 PE=3 SV=1	24 kDa	0	0	0	0	0	0	1
RL17_CAEEL	60S ribosomal protein L17 OS=Caenorhabditis elegans GN=rpl-17 PE=3 SV=1	22 kDa	0	0	0	0	0	2	1
RL18_CAEEL	60S ribosomal protein L18 OS=Caenorhabditis elegans GN=rpl-18 PE=3 SV=1	21 kDa	0	0	0	0	0	1	5
RL18A_CAEEL	60S ribosomal protein L18a OS=Caenorhabditis elegans GN=rpl-20 PE=3 SV=2	21 kDa	0	0	0	0	0	0	2
RL19_CAEEL	60S ribosomal protein L19 OS=Caenorhabditis elegans GN=rpl-19 PE=3 SV=1	24 kDa	0	0	0	0	0	0	1
RL24_CAEEL	60S ribosomal protein L24 OS=Caenorhabditis elegans GN=rpl-24.1 PE=3 SV=1	18 kDa	0	0	0	0	0	0	1
RL27_CAEEL	60S ribosomal protein L27 OS=Caenorhabditis elegans GN=rpl-27 PE=2 SV=1	16 kDa	0	0	0	0	0	1	2
RL3_CAEEL	60S ribosomal protein L3 OS=Caenorhabditis elegans GN=rpl-3 PE=2 SV=1	46 kDa	0	0	0	0	0	0	2
RL36_CAEEL	60S ribosomal protein L36 OS=Caenorhabditis elegans GN=rpl-36 PE=1 SV=3	12 kDa	0	0	0	0	0	2	1
RL5_CAEEL	60S ribosomal protein L5 OS=Caenorhabditis elegans GN=rpl-5 PE=3 SV=1	33 kDa	0	0	0	0	0	0	2
RL6_CAEEL	60S ribosomal protein L6 OS=Caenorhabditis elegans GN=rpl-6 PE=1 SV=1	24 kDa	0	0	0	0	0	2	2
RL7_CAEEL	60S ribosomal protein L7 OS=Caenorhabditis elegans GN=rpl-7 PE=3 SV=1	28 kDa	0	0	0	0	0	0	2
RL7A_CAEEL	60S ribosomal protein L7a OS=Caenorhabditis elegans GN=rpl-7A PE=1 SV=3	30 kDa	0	0	0	0	0	1	0
RL8_CAEEL	60S ribosomal protein L8 OS=Caenorhabditis elegans GN=rpl-8 PE=3 SV=1	28 kDa	0	0	0	0	0	0	1
RL9_CAEEL	60S ribosomal protein L9 OS=Caenorhabditis elegans GN=rpl-9 PE=3 SV=1	22 kDa	0	0	0	0	0	0	1
RLA0_CAEEL	60S acidic ribosomal protein P0 OS=Caenorhabditis elegans GN=rpa-0 PE=1 SV=3	34 kDa	0	0	0	0	0	1	3
RLA1_CAEEL	60S acidic ribosomal protein P1 OS=Caenorhabditis elegans GN=rla-1 PE=3 SV=2	11 kDa	0	0	0	0	0	0	1
RLA2_CAEEL	60S acidic ribosomal protein P2 OS=Caenorhabditis elegans GN=rpa-2 PE=3 SV=2	11 kDa	0	0	0	0	0	1	0
RS12_CAEEL	40S ribosomal protein S12 OS=Caenorhabditis elegans GN=rps-12 PE=3 SV=2	15 kDa	0	0	0	0	0	0	1
RS14_CAEEL	40S ribosomal protein S14 OS=Caenorhabditis elegans GN=rps-14 PE=3 SV=1	16 kDa	0	0	0	0	0	0	3
RS15_CAEEL	40S ribosomal protein S15 OS=Caenorhabditis elegans GN=rps-15 PE=1 SV=3	17 kDa	0	0	0	0	0	2	0
RS16_CAEEL	40S ribosomal protein S16 OS=Caenorhabditis elegans GN=rps-16 PE=1 SV=3	16 kDa	0	0	0	0	0	0	1
RS17_CAEEL	40S ribosomal protein S17 OS=Caenorhabditis elegans GN=rps-17 PE=3 SV=2	15 kDa	0	0	0	0	0	1	1
RS25_CAEEL	40S ribosomal protein S25 OS=Caenorhabditis elegans GN=rps-25 PE=3 SV=1	13 kDa	0	0	0	0	0	0	2
RS3_CAEEL	40S ribosomal protein S3 OS=Caenorhabditis elegans GN=rps-3 PE=3 SV=1	27 kDa	0	0	0	0	0	1	0
RS6_CAEEL	40S ribosomal protein S6 OS=Caenorhabditis elegans GN=rps-6 PE=1 SV=1	28 kDa	0	0	0	0	0	0	1
RS7_CAEEL	40S ribosomal protein S7 OS=Caenorhabditis elegans GN=rps-7 PE=3 SV=1	22 kDa	0	0	0	0	0	0	2
RS8_CAEEL	40S ribosomal protein S8 OS=Caenorhabditis elegans GN=rps-8 PE=3 SV=1	24 kDa	0	0	0	0	0	1	3
RSSA_CAEEL	40S ribosomal protein SA OS=Caenorhabditis elegans GN=rps-0 PE=1 SV=3	31 kDa	0	0	0	0	0	0	2
sp|O02328|EIF3C_CAEEL-DECOY	Eukaryotic translation initiation factor 3 subunit C OS=Caenorhabditis elegans GN=eif-3.C PE=3 SV=2	?	0	0	0	0	0	0	2
sp|O17581|SCC4_CAEEL-DECOY	Maternal uncoordinated protein 2 OS=Caenorhabditis elegans GN=mau-2 PE=1 SV=1	?	0	0	0	0	0	1	0
sp|P34305|RHA2_CAEEL-DECOY	Putative ATP-dependent RNA helicase rha-2 OS=Caenorhabditis elegans GN=rha-2 PE=3 SV=2	?	0	0	0	0	0	0	1
sp|P34494|YMQ3_CAEEL-DECOY	Uncharacterized protein K02D10.3 OS=Caenorhabditis elegans GN=K02D10.3 PE=4 SV=1	?	0	0	0	0	0	0	1
sp|P34663|HM23_CAEEL-DECOY	Homeobox protein ceh-23 OS=Caenorhabditis elegans GN=ceh-23 PE=2 SV=1	?	0	0	0	0	0	0	1
sp|Q19253|TOCA1_CAEEL-DECOY	Transducer of Cdc42-dependent actin assembly protein 1 homolog OS=Caenorhabditis elegans GN=toca-1 PE=1 SV=2	?	0	0	0	0	0	0	2
sp|Q23381|MUTA_CAEEL-DECOY	Probable methylmalonyl-CoA mutase, mitochondrial OS=Caenorhabditis elegans GN=mmcm-1 PE=3 SV=2	?	0	0	0	0	1	0	0
sp|Q23628|LON3_CAEEL-DECOY	Cuticle collagen lon-3 OS=Caenorhabditis elegans GN=lon-3 PE=2 SV=1	?	0	0	0	0	0	1	0
sp|Q9U332|RL31_CAEEL-DECOY	60S ribosomal protein L31 OS=Caenorhabditis elegans GN=rpl-31 PE=3 SV=1	?	0	0	0	0	0	0	1
STAM1_CAEEL	Signal transducing adapter molecule 1 OS=Caenorhabditis elegans GN=stam-1 PE=1 SV=2	51 kDa	0	0	0	0	1	0	0
TBA2_CAEEL [3]	Cluster of Tubulin alpha-2 chain OS=Caenorhabditis elegans GN=tba-2 PE=2 SV=1 (TBA2_CAEEL)	50 kDa	0	0	0	0	0	1	0
TOCA1_CAEEL	Transducer of Cdc42-dependent actin assembly protein 1 homolog OS=Caenorhabditis elegans GN=toca-1 PE=1 SV=2	65 kDa	0	0	0	0	0	0	1
tr|A0A061ACU6|A0A061ACU6_CAEEL-DECOY (+2)	Slit-Robo GAP homolog OS=Caenorhabditis elegans GN=srgp-1 PE=1 SV=1	?	0	0	0	0	0	0	1
tr|A0A131MBN9|A0A131MBN9_CAEEL-DECOY	Uncharacterized protein OS=Caenorhabditis elegans GN=CELE_F41F3.9 PE=4 SV=1	?	0	0	0	0	0	0	1
tr|A8WFK3|A8WFK3_CAEEL-DECOY	Uncharacterized protein OS=Caenorhabditis elegans GN=C33F10.4 PE=1 SV=1	?	0	0	0	0	0	0	1
tr|A8WI09|A8WI09_CAEEL-DECOY	Uncharacterized protein OS=Caenorhabditis elegans GN=C14A6.12 PE=4 SV=1	?	0	0	0	0	0	1	0
tr|B9WRU1|B9WRU1_CAEEL-DECOY	Uncharacterized protein OS=Caenorhabditis elegans GN=CELE_Y41E3.11 PE=1 SV=1	?	0	0	0	0	0	0	2
tr|E3W737|E3W737_CAEEL-DECOY (+1)	Vertebrate Pre-mRNA Processing Factor OS=Caenorhabditis elegans GN=prpf-4 PE=1 SV=1	?	0	0	0	0	0	0	1
tr|G5ECI9|G5ECI9_CAEEL-DECOY	Uncharacterized protein OS=Caenorhabditis elegans GN=unc-79 PE=1 SV=1	?	0	0	0	0	0	0	1
tr|G5EEN0|G5EEN0_CAEEL-DECOY	Uncharacterized protein OS=Caenorhabditis elegans GN=CELE_T15D6.1 PE=4 SV=1	?	0	0	0	0	0	0	1
tr|G5EFV7|G5EFV7_CAEEL-DECOY (+2)	ATP-dependent DNA helicase PIF1 OS=Caenorhabditis elegans GN=pif-1 PE=2 SV=1	?	0	0	0	0	0	0	1
tr|H2L008|H2L008_CAEEL-DECOY	Zinc finger putative Transcription Factor family OS=Caenorhabditis elegans GN=ztf-16 PE=1 SV=1	?	0	0	0	0	0	0	1
tr|O01465|O01465_CAEEL-DECOY	GRounDhog (Hedgehog-like family) OS=Caenorhabditis elegans GN=grd-9 PE=4 SV=2	?	0	0	0	0	1	0	0
tr|O17002|O17002_CAEEL-DECOY	DNaJ domain (Prokaryotic heat shock protein) OS=Caenorhabditis elegans GN=dnj-22 PE=1 SV=1	?	0	0	0	0	1	0	0
tr|O18168|O18168_CAEEL-DECOY	Uncharacterized protein OS=Caenorhabditis elegans GN=CELE_W04G5.3 PE=4 SV=1	?	0	0	0	0	1	0	0
tr|P91198|P91198_CAEEL-DECOY	Protein Phosphatase Four Regulatory subunit OS=Caenorhabditis elegans GN=ppfr-2 PE=1 SV=1	?	0	0	0	0	0	0	1
tr|P91224|P91224_CAEEL-DECOY	F-box B protein OS=Caenorhabditis elegans GN=fbxb-36 PE=4 SV=2	?	0	0	0	0	0	0	1
tr|Q17676|Q17676_CAEEL-DECOY	Uncharacterized protein OS=Caenorhabditis elegans GN=C05G5.2 PE=1 SV=1	?	0	0	0	0	0	1	0
tr|Q21009|Q21009_CAEEL-DECOY	Uncharacterized protein OS=Caenorhabditis elegans GN=CELE_F58G6.3 PE=4 SV=2	?	0	0	0	0	0	0	1
tr|Q21555|Q21555_CAEEL-DECOY	Uncharacterized protein OS=Caenorhabditis elegans GN=CELE_M18.3 PE=1 SV=1	?	0	0	0	0	0	0	1
tr|Q22042|Q22042_CAEEL-DECOY	TWiK family of potassium channels OS=Caenorhabditis elegans GN=twk-21 PE=3 SV=2	?	0	0	0	0	0	0	3
tr|Q23641|Q23641_CAEEL-DECOY	Uncharacterized protein OS=Caenorhabditis elegans GN=CELE_ZK856.6 PE=4 SV=1	?	0	0	0	0	6	0	0
tr|Q4TTC6|Q4TTC6_CAEEL-DECOY	Uncharacterized protein OS=Caenorhabditis elegans GN=CELE_ZK418.10 PE=3 SV=1	?	0	0	0	0	4	0	0
tr|Q4W5S8|Q4W5S8_CAEEL-DECOY	Uncharacterized protein OS=Caenorhabditis elegans GN=CELE_Y49F6B.12 PE=4 SV=1	?	0	0	0	0	0	0	2
tr|Q86D09|Q86D09_CAEEL-DECOY	COLlagen OS=Caenorhabditis elegans GN=col-163 PE=4 SV=1	?	0	0	0	0	0	0	1
tr|Q95Y68|Q95Y68_CAEEL-DECOY	Uncharacterized protein OS=Caenorhabditis elegans GN=CELE_Y119D3B.21 PE=1 SV=1	?	0	0	0	0	0	0	1
tr|Q9N3D8|Q9N3D8_CAEEL-DECOY	Uncharacterized protein OS=Caenorhabditis elegans GN=CELE_Y54E10BL.3 PE=4 SV=2	?	0	0	0	0	0	1	0
tr|Q9TXW4|Q9TXW4_CAEEL-DECOY	SKN-1 Dependent Zygotic transcript OS=Caenorhabditis elegans GN=sdz-34 PE=4 SV=1	?	0	0	0	0	5	0	0
tr|Q9TYZ8|Q9TYZ8_CAEEL-DECOY	Uncharacterized protein OS=Caenorhabditis elegans GN=CELE_F58E2.4 PE=4 SV=1	?	0	0	0	0	0	0	1
UNC87_CAEEL	Protein unc-87 OS=Caenorhabditis elegans GN=unc-87 PE=1 SV=3	63 kDa	0	0	0	0	2	0	0
WAGO1_CAEEL [2]	Cluster of Argonaute protein wago-1 OS=Caenorhabditis elegans GN=wago-1 PE=1 SV=1 (WAGO1_CAEEL)	105 kDa	0	0	0	0	0	11	11
